# Supplementary material for: Precise segmentation of densely interweaving neuron clusters using G-Cut
Source: PubMed Central journal article supplement (PMC6449501; doi:10.1038/s41467-019-09515-0), 2019-04-04
Supplement: 41467_2019_9515_MOESM2_ESM.pdf [file 41467_2019_9515_MOESM2_ESM.pdf]

## Description of Additional Supplementary Files

File Name: Supplementary Movie 1

Description: This movie shows an example of using G-Cut to simultaneously segment multiple neurons labeled with rabies viral tracers.

File Name: Supplementary Software 1

Description: G-Cut is open source and available as Supplementary Software written in Matlab code. All source code is freely available for noncommercial use (<https://muyezhu@bitbucket.org/muyezhu/gcut.git>).
